# Supplementary material for: World Wide Lightning Location Network (WWLLN) Global Lightning Climatology (WGLC) and time series, 2022 update
Source: Copernicus journal article supplement (doi:10.5194/essd-14-5665-2022), 2022-12-21
Supplement: Supplementary file 1 [file essd-14-5665-2022-supplement.pdf]

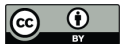

*Supplement of*

## **World Wide Lightning Location Network (WWLLN) Global Lightning Climatology (WGLC) and time series, 2022 update**

**Jed O. Kaplan and Katie Hong-Kiu Lau**

*Correspondence to:* Jed O. Kaplan ([jed.kaplan@hku.hk](mailto:jed.kaplan@hku.hk))

The copyright of individual parts of the supplement might differ from the article licence.



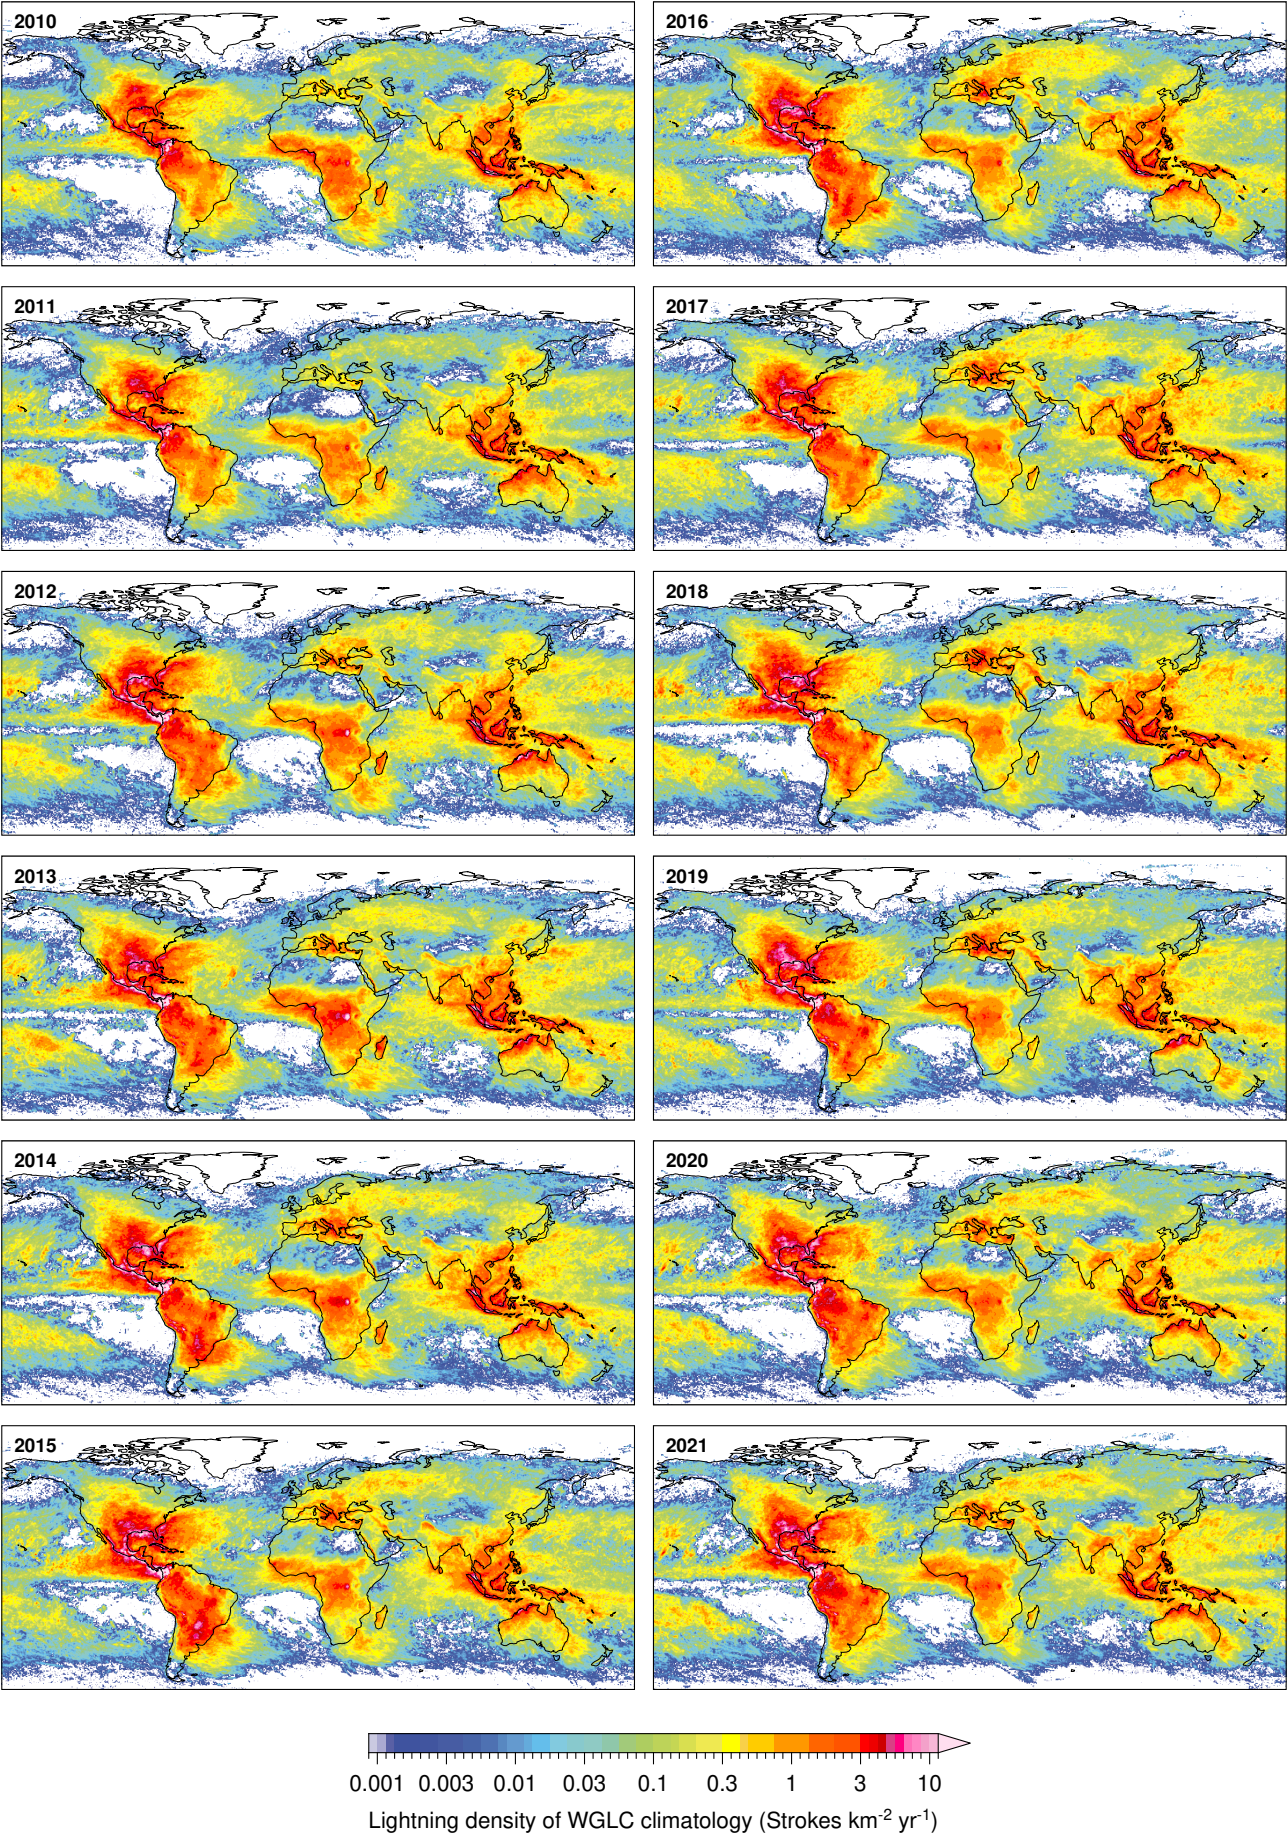

**Figure S1.** WGLC annual lightning density maps (2010-2021)



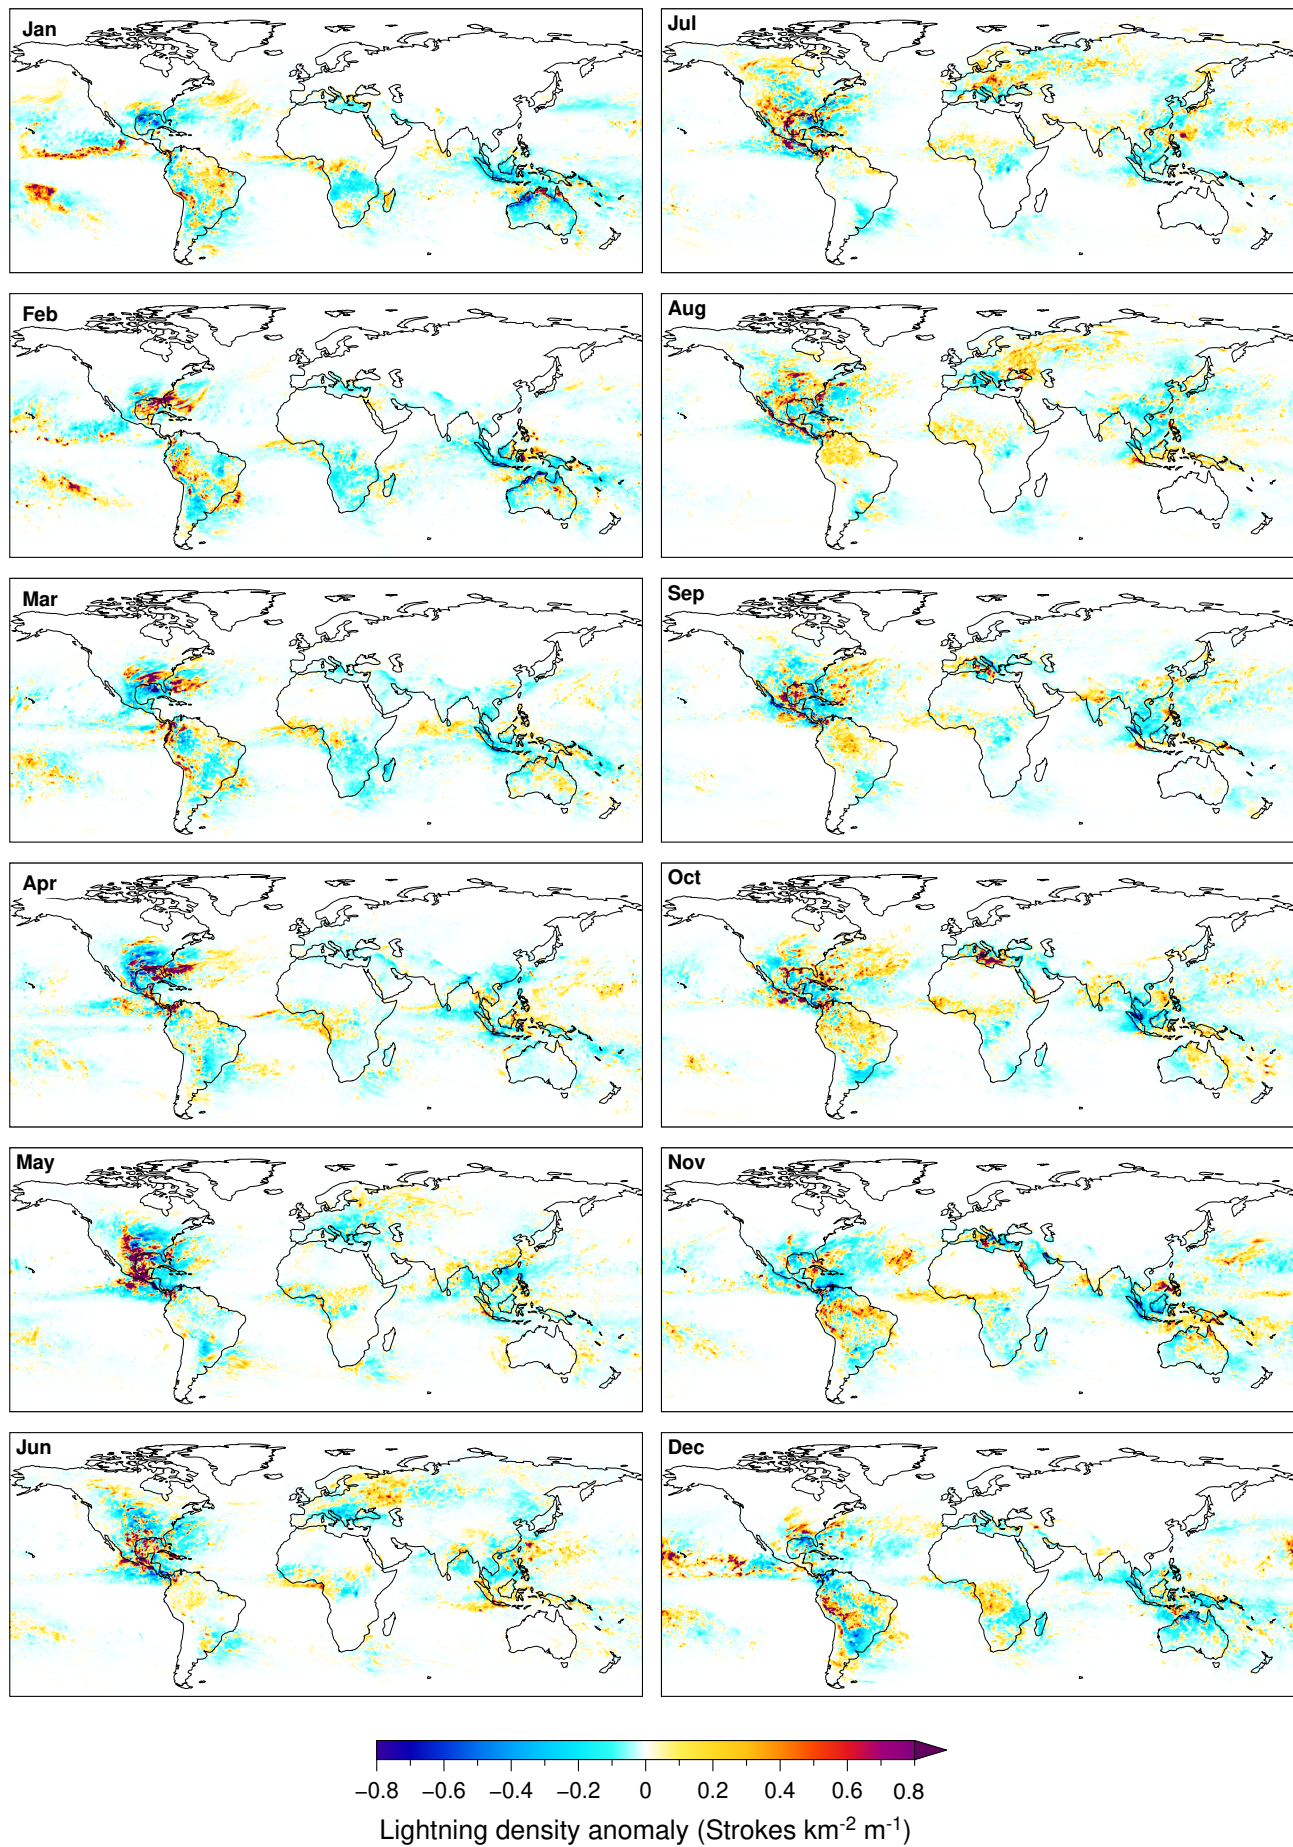

**Figure S2.** Difference between monthly lightning observed in 2021 and the 2010-2020 climatological mean.
